# Supplementary material
Source: publisher site journal article supplement (https://www.dovepress.com/article/338085)
Supplement: Supplementary file 1 [file get_supplementary_file.php]

**Supplementary Materials**


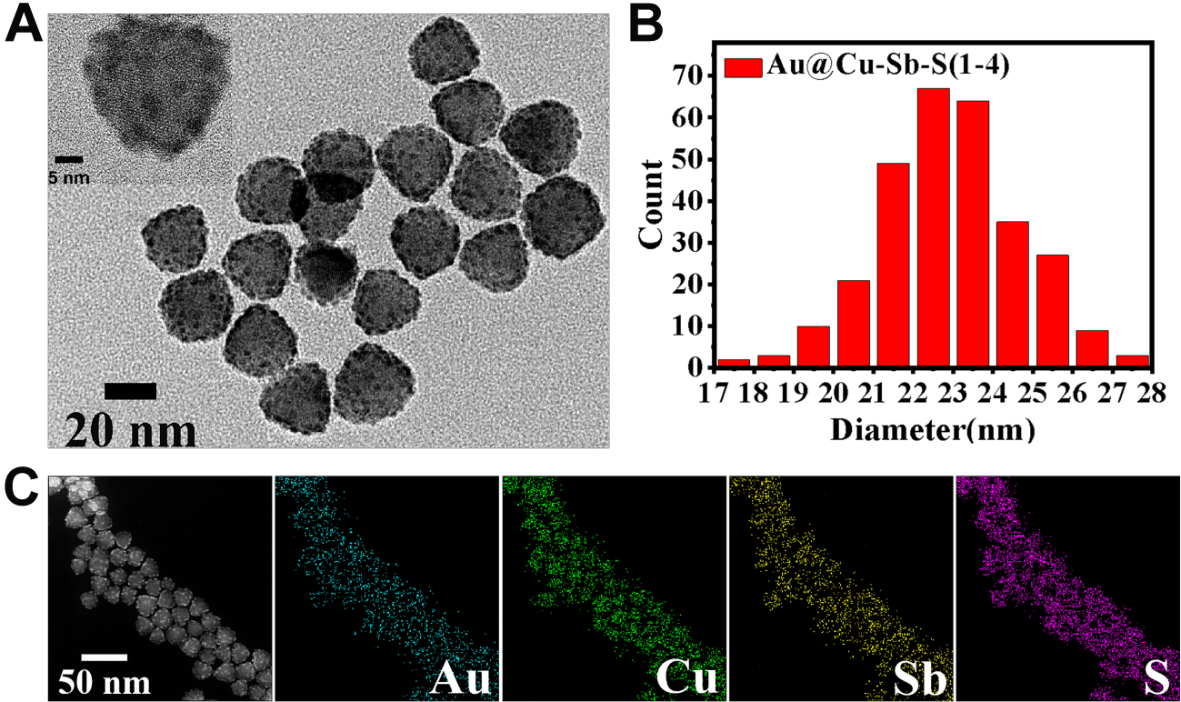


**Figure S1** The characterization of Au@Cu-Sb-S(1-4) NPs. (**A**) TEM image. (**B**) Particle size distribution. (**C**) TEM-EDS elemental maps.

**
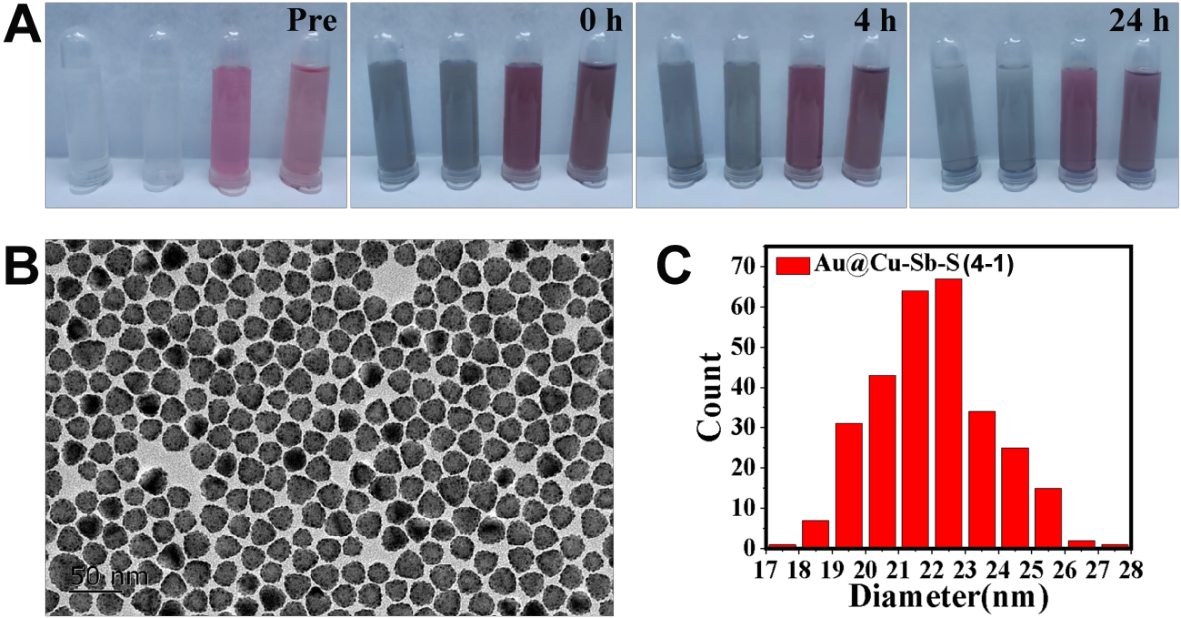
**

**Figure S2** (**A**) Digital photographs of Au@Cu-Sb-S(4-1) NPs after dispersed in different solutions for varied durations (From left to right: Pure water, PBS, RPMI-1640 and RPMI-1640 with 10% FBS). (**B**) TEM image and (**C**) Particle size distribution of Au@Cu-Sb-S(4-1) NPs 7 days after synthesis.

**
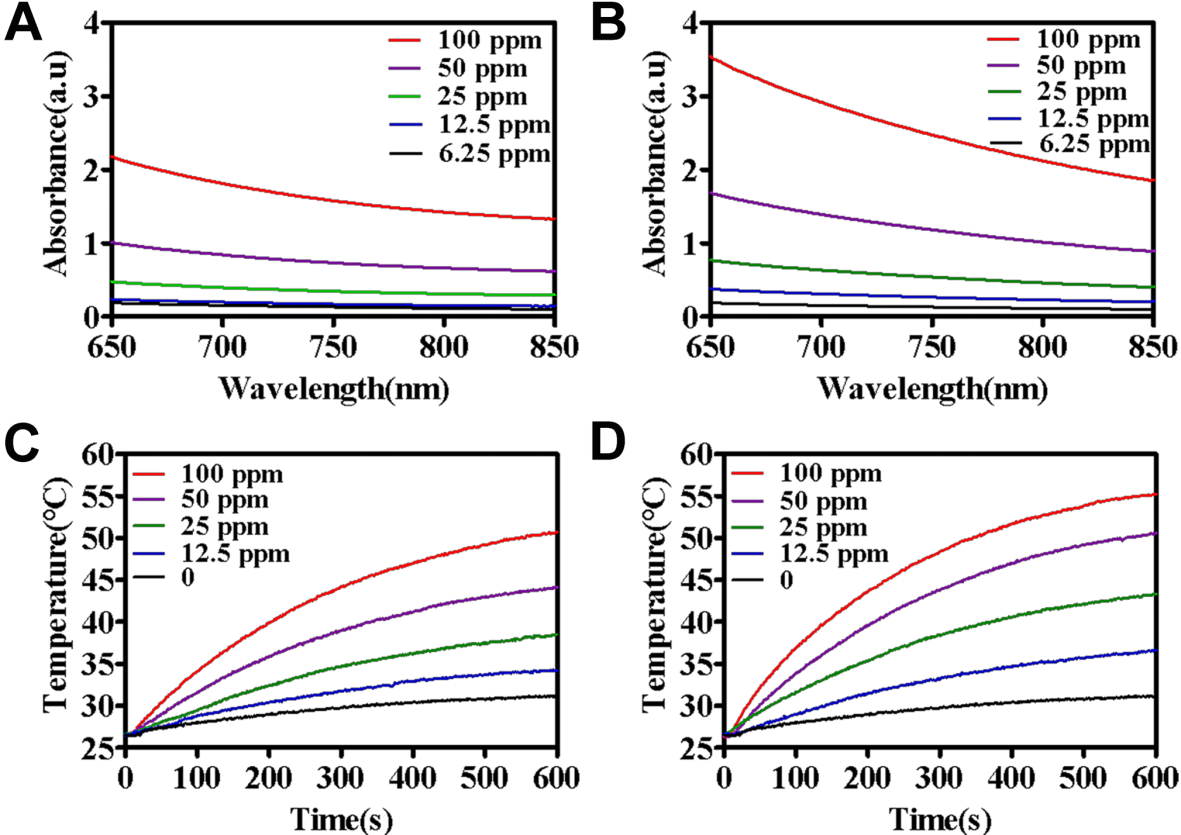
**

**Figure S3** UV–vis–NIR absorbance spectrum of different concentrations of Au@Cu-Sb-S(1-4) NPs (**A**) and Au@Cu-Sb-S(4-1) NPs (**B**). Heating curves of Au@Cu-Sb-S(1-4) NPs (**C**) and Au@Cu-Sb-S(4-1) NPs (**D**) aqueous dispersion with different concentrations under the irradiation of 808 nm laser (1 W cm-2).

**
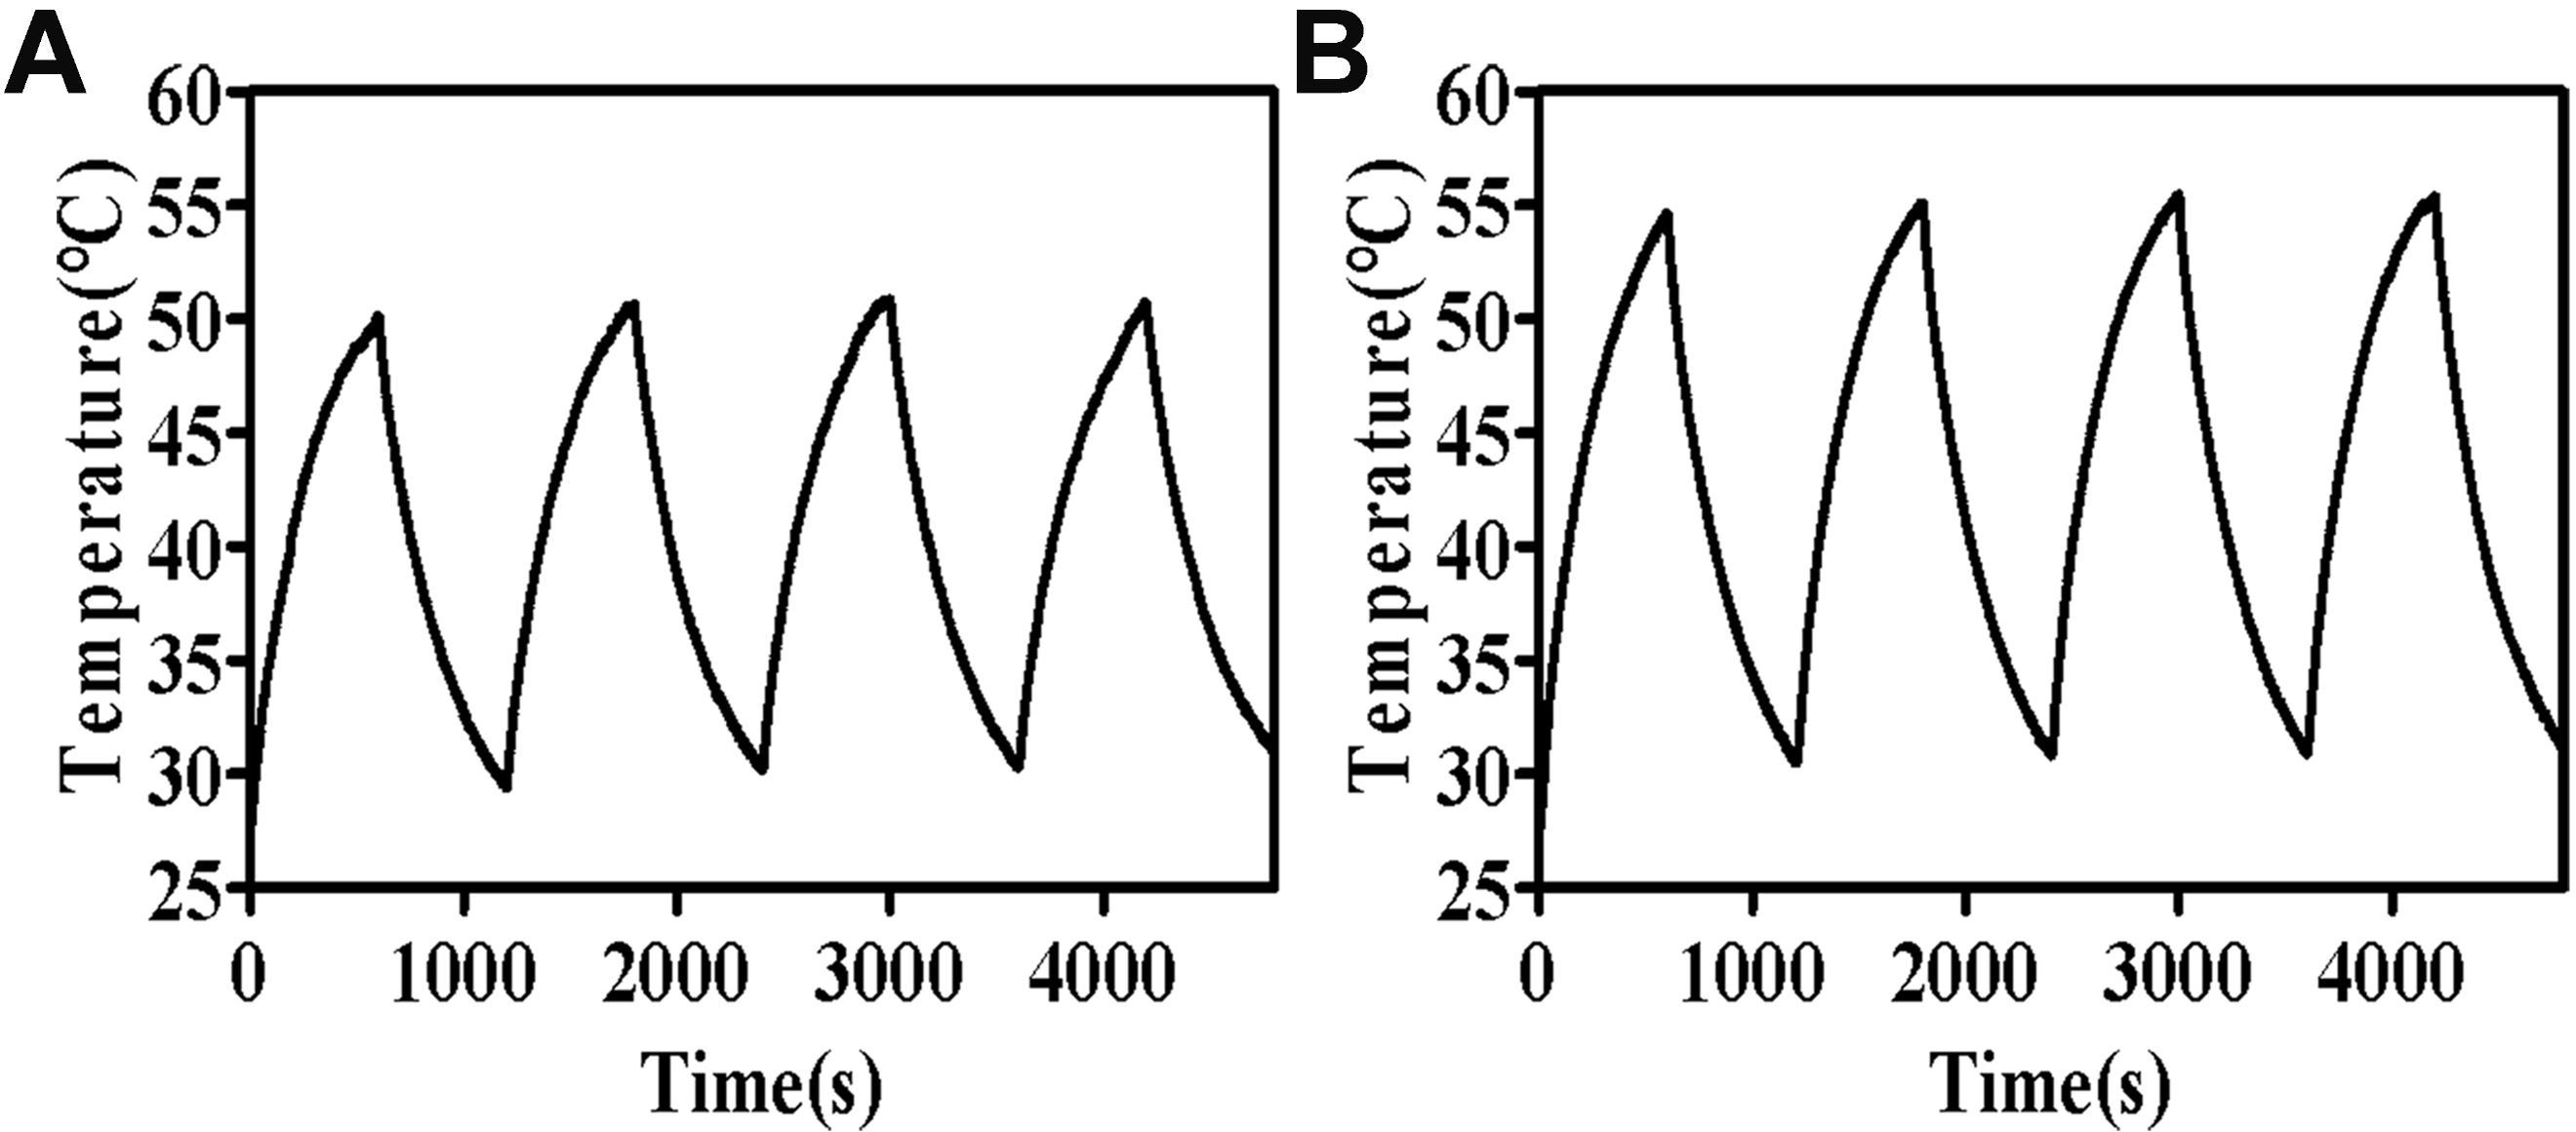
**

**Figure S4** Temperature-time curves of Au@Cu-Sb-S(1-4) NPs (**A**) and Au@Cu-Sb-S(4-1) NPs (**B**) aqueous dispersion containing 100 ppm Sb over 4 heating-cooling cycles.

**
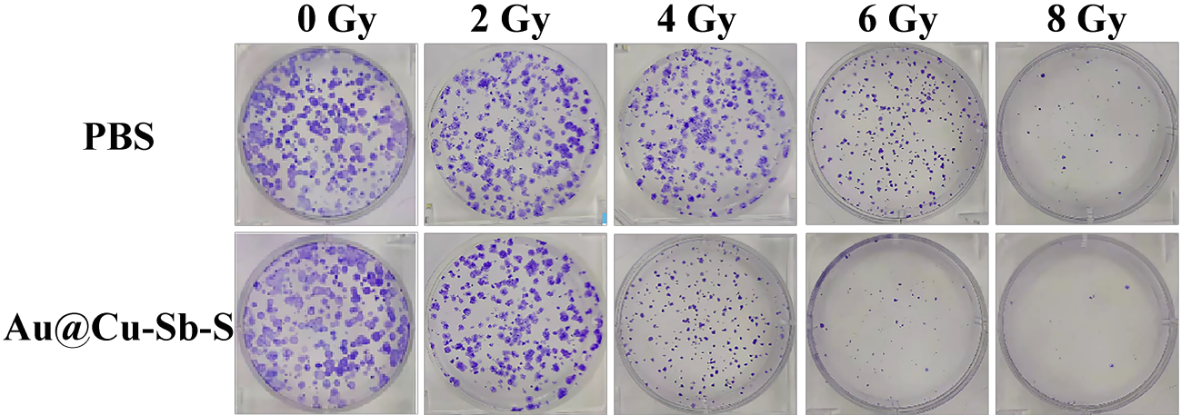
**

**Figure S5** Clonogenic assay of 4T1 cells with PBS or Au@Cu-Sb-S NPs at different X-ray irradiation dose.

**
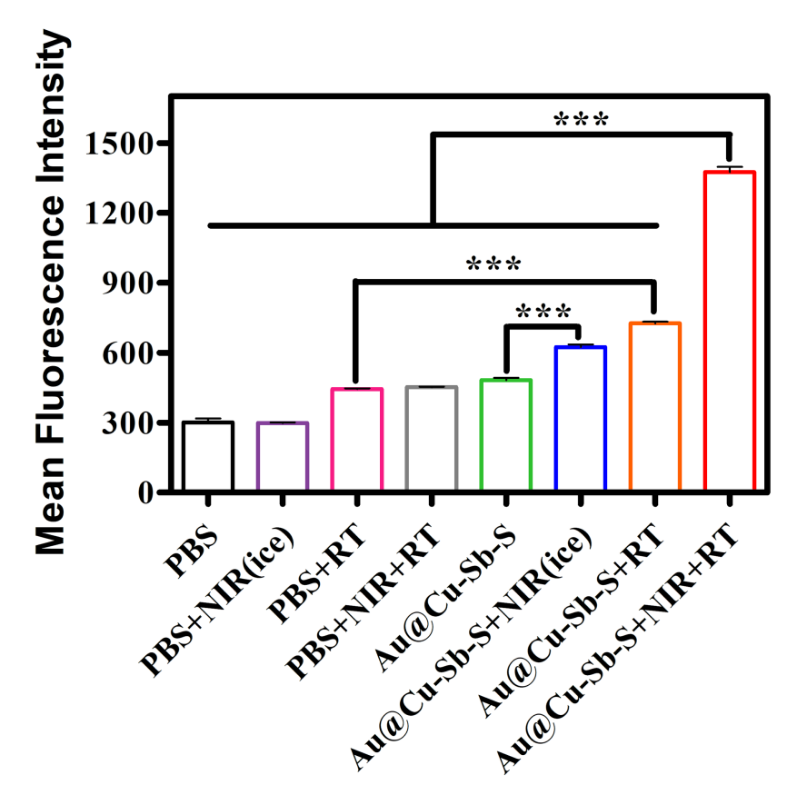
**

**Figure S6** Mean ROS fluorescence intensity of 4T1 cells after different treatments. (Significant differences are represented as ****p* < 0.001.)


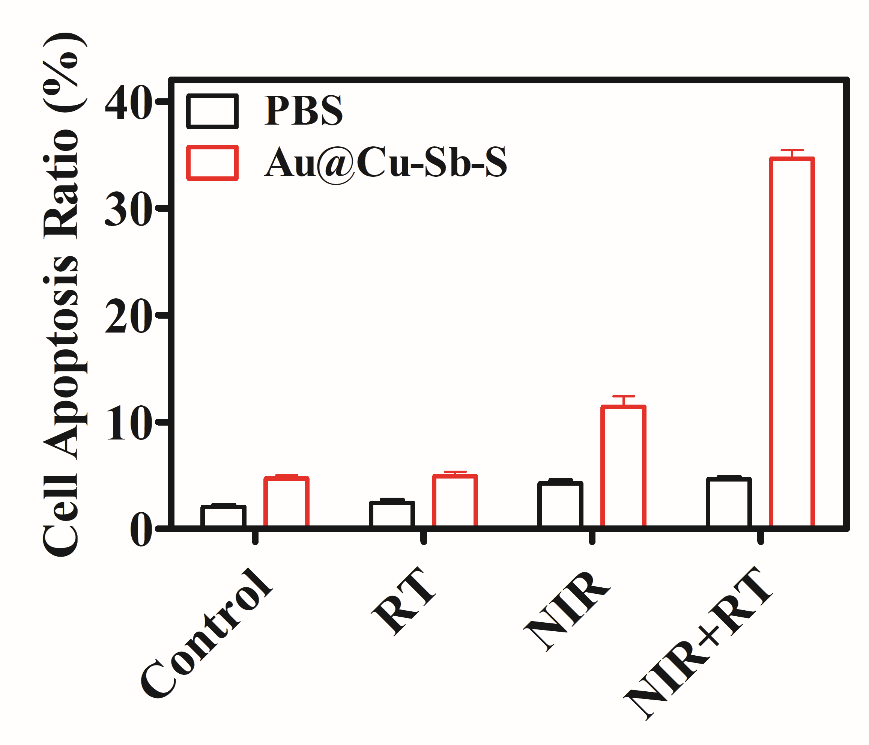


**Figure S7** Apoptosis ratio of 4T1 cells after different treatments.

**
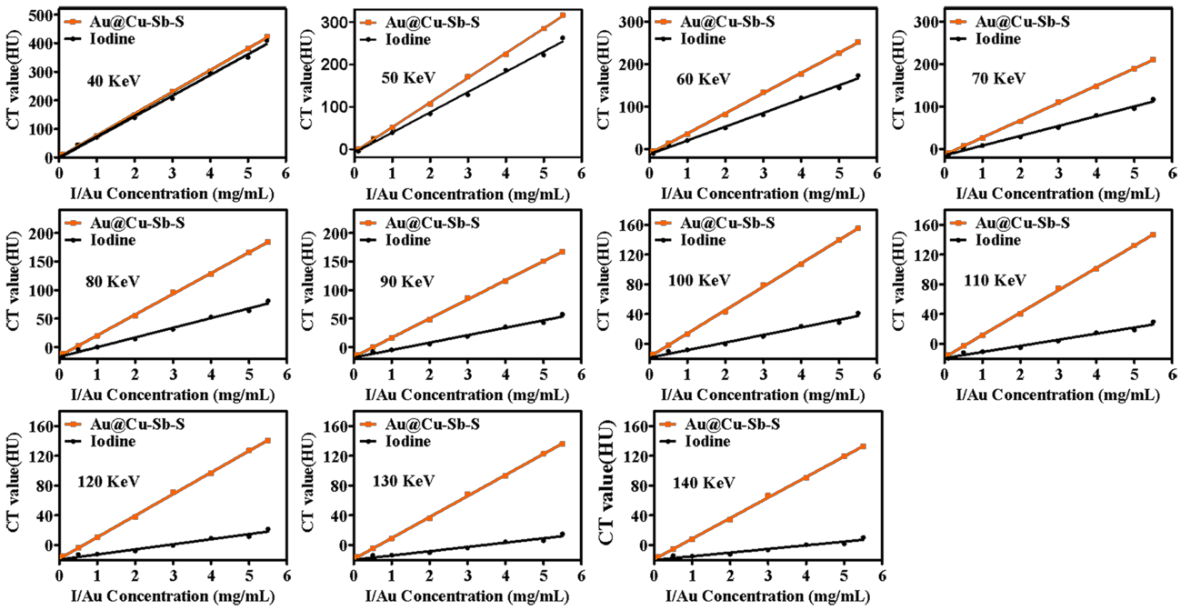
**

**Figure S8** The CT values of Au@Cu-Sb-S NPs and Iodine with concentration changes under different KeV conditions.

**
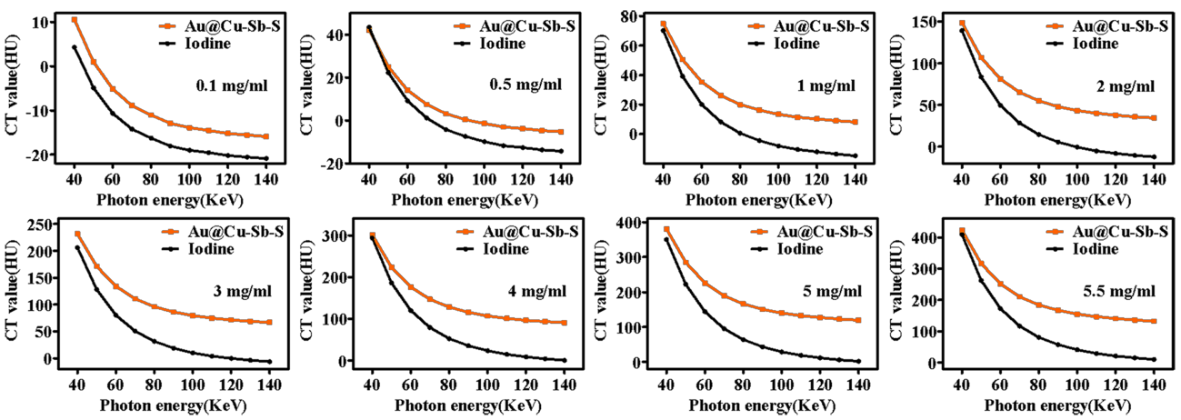
**

**Figure S9** The CT values of Au@Cu-Sb-S NPs and Iodine with KeV changes under different Au/I conditions.

**
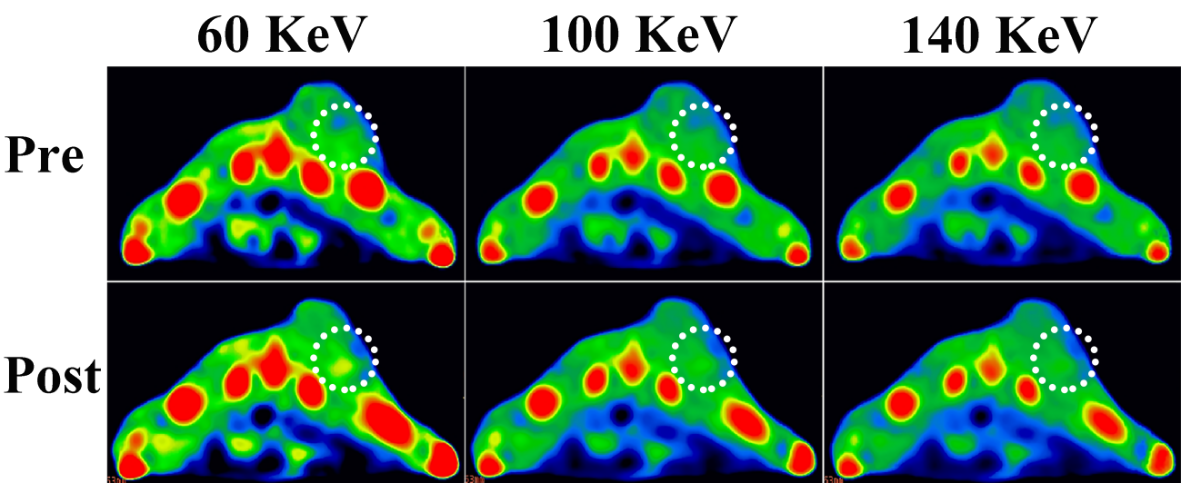
**

**Figure S10** *In vivo* CT images of mice with the same concentration of Au @ Cu-Sb-S NPs and Iodine before and after intratumoral injection at 60, 100 and 140 KeV (2 mg mL-1 Au/I, 25 μL).


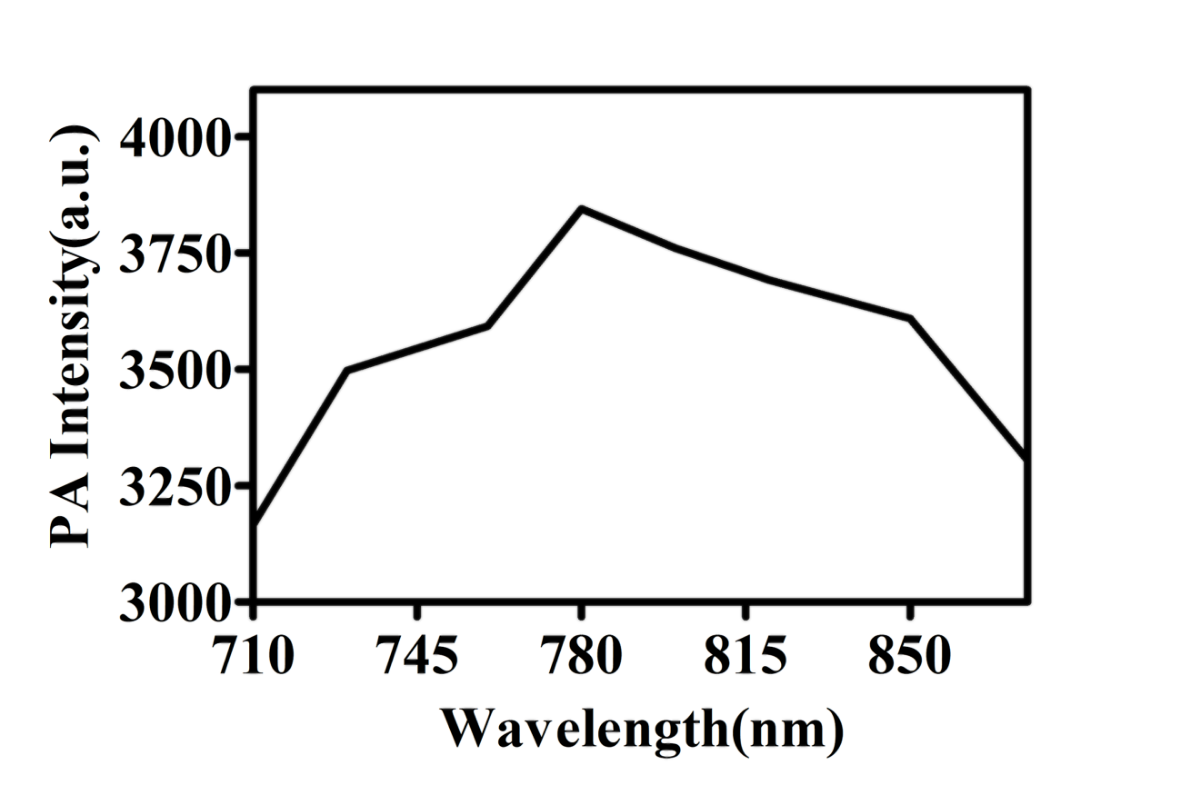


**Figure S11** The photoacoustic spectrum curve of Au@Cu-Sb-S NPs (100 Sb ppm) shows the photoacoustic signal values of NPs at different excitation wavelengths.


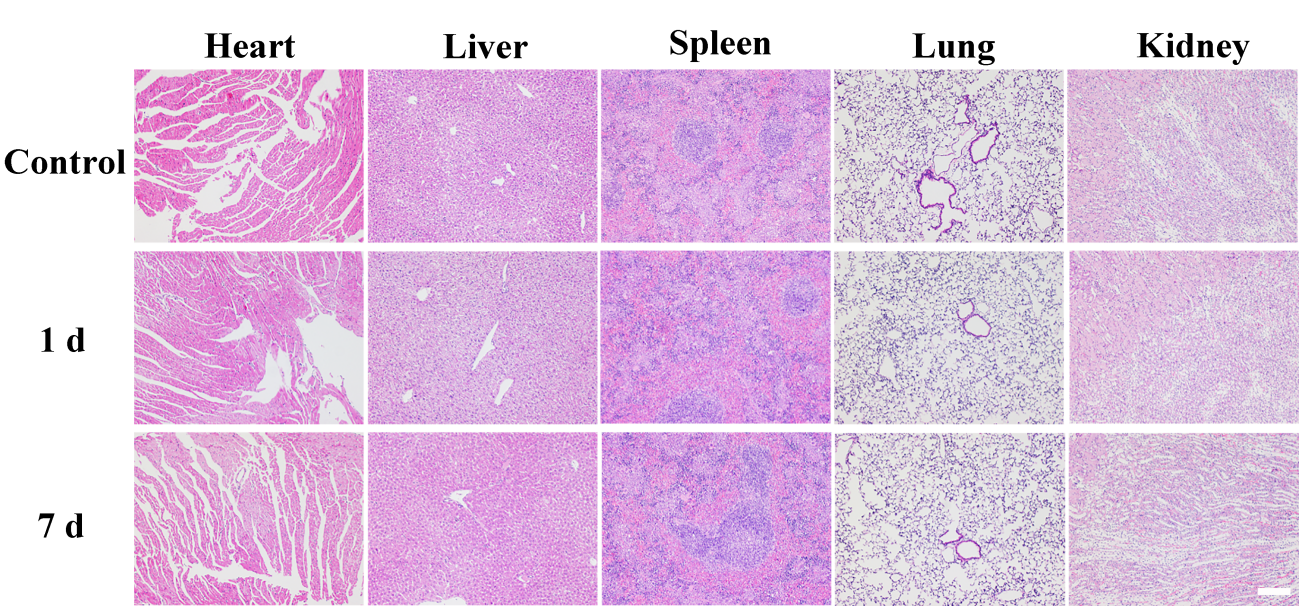


**Figure S12** H&E staining of the major organs (heart, liver, spleen, lung, kidney) collected from healthy BALB/c mice at 1 and 7 days after intravenous injection of PVP-Cu-Sb-S NPs or saline (control).


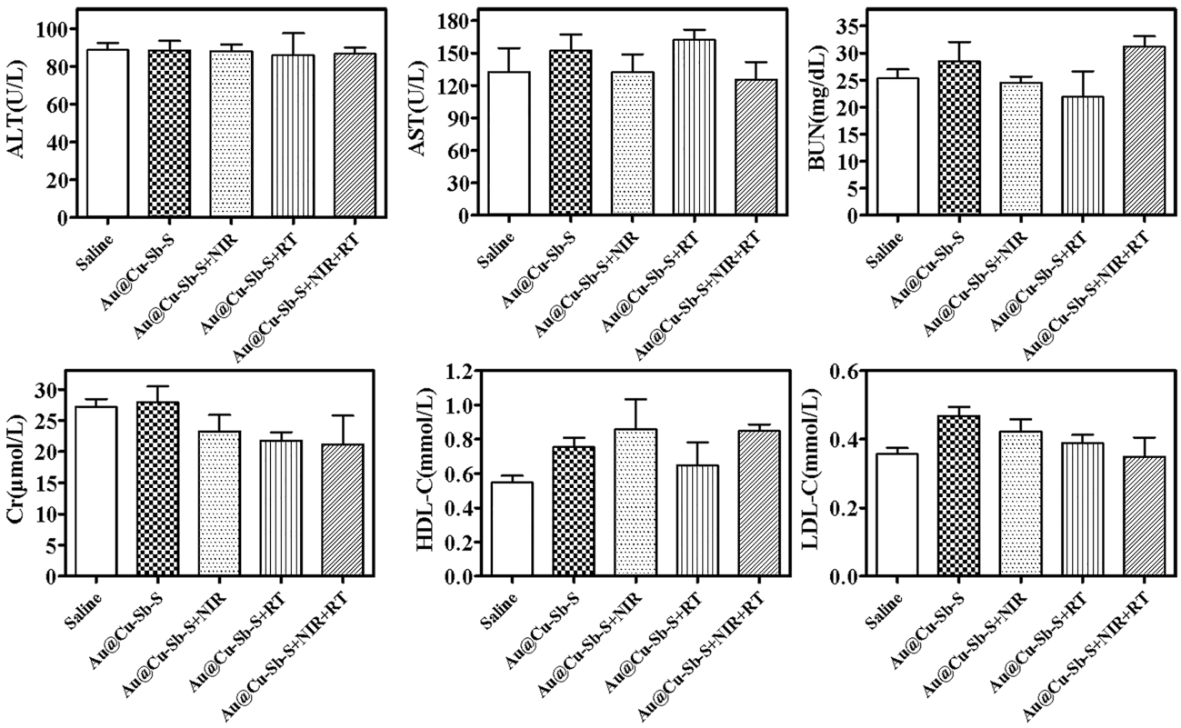


**Figure S13** Blood biochemical results of mice in different treatment groups after 21 days.


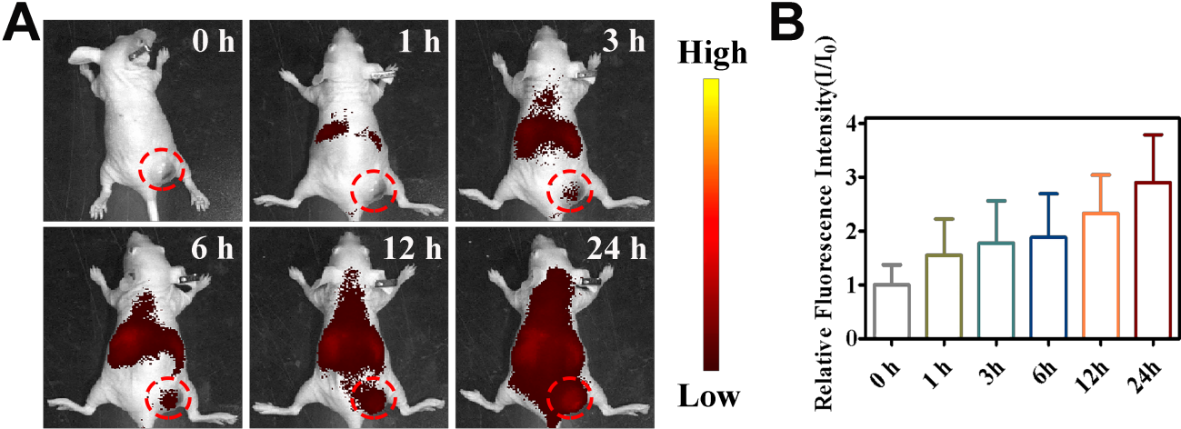


**Figure S14** *In vivo* bio-distribution of IR825@Au@Cu-Sb-S NPs. (**A**) *In vivo* tumor targeting ability of IR825@Au@Cu-Sb-S NPs over time. (**B**) Relative fluorescence signal in the tumor over time after injection with formulations.
